# Supplementary material for: Strong Immune Responses Induced by Direct Local Injections of Modified mRNA-Lipid Nanocomplexes
Source: PubMed Central journal article supplement — Mol Ther Nucleic Acids. 2020 Jan 16;19:1098–109. doi: 10.1016/j.omtn.2019.12.044 (PMC7016160; doi:10.1016/j.omtn.2019.12.044), 2020-01-16
Supplement: mmc1.pdf [file mmc1.pdf]

**OMTN, Volume 19**

**Supplemental Information**

**Strong Immune Responses Induced  
by Direct Local Injections of Modified  
mRNA-Lipid Nanocomplexes**

**Smriti Arya, Qiubin Lin, Nan Zhou, Xiang Gao, and Jian-Dong Huang**

## Supplementary data

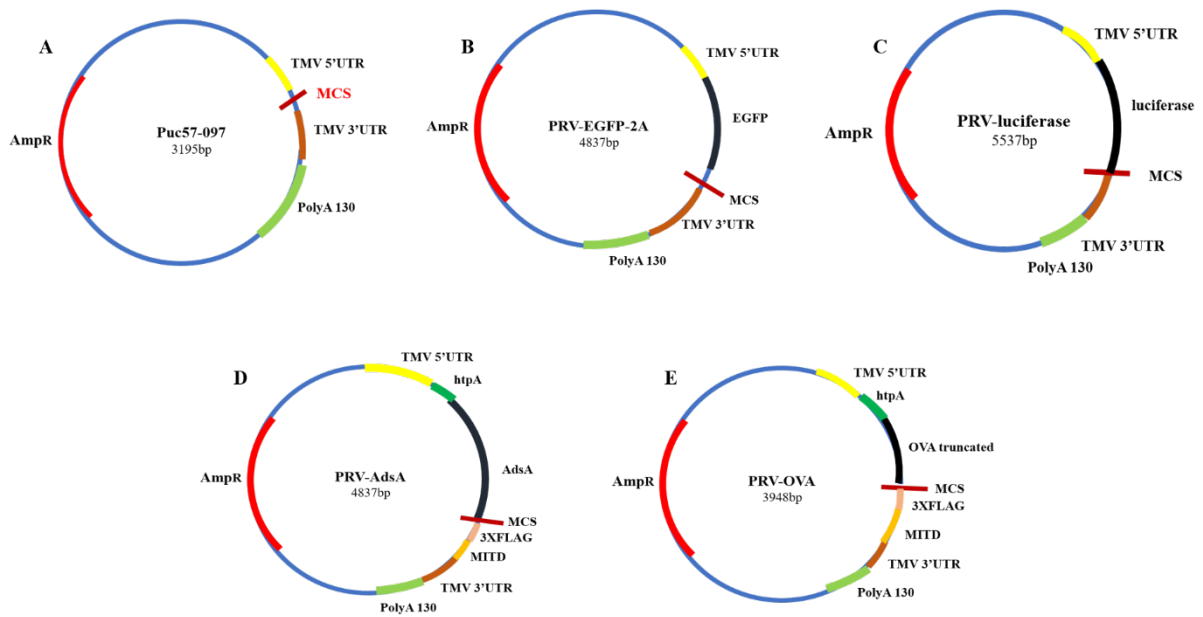

*Figure S1: plasmid maps. A. pRV was modified from pUC57-097 plasmid with 5' and 3' UTR regions of TMV and a poly A tail. B. pRV-EGFP plasmid. C. pRV-luciferase plasmid. D. pRV-AdsA plasmid backbone with hTPA, MITD and FLAG tag. E. pRV-OVA plasmid backbone with hTPA, MITD and FLAG tag.*

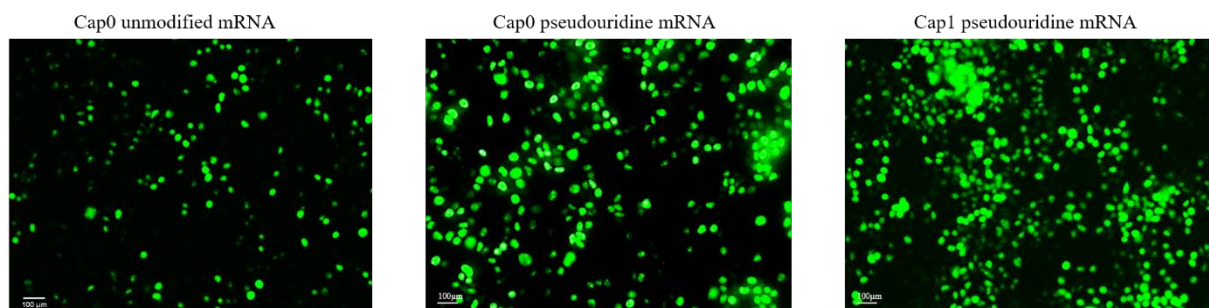

*Figure S2: In vitro mRNA transfection with mRNAs carrying different modifications. Five hundred ng of Cap0 unmodified, Cap0 pseudouridine modified and Cap1 pseudouridine modified EGFP mRNAs were transfected with the commercial Lipofectamine Messenger Max to HEK-293 cells. Pictures were taken 24 hrs after transfection-*

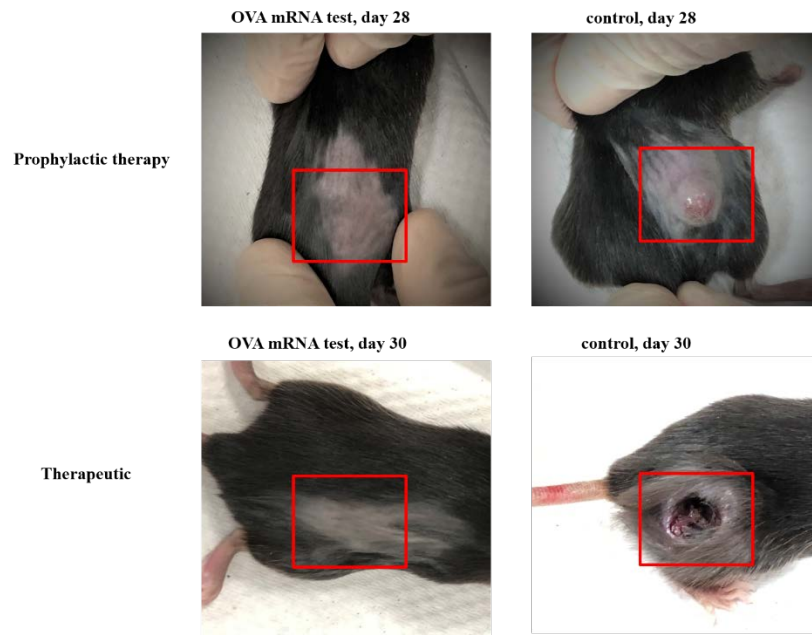

*Figure S3: Tumour sizes for prophylactic and therapeutic vaccination with OVA mRNA complexed with InstantFECT.*
